# Supplementary material for: Hierarchical assembly of ZnO nanowire trunks decorated with ZnO nanosheets for lithium ion battery anodes
Source: Royal Society of Chemistry journal article supplement (doi:10.1039/d0ra00372g), 2020-01-01
Supplement: d0ra00372g1.pdf [file d0ra00372g1.pdf]

# Supporting Information for:

## Hierarchical Assembly of ZnO Nanowire Trunks Decorated with ZnO Nanosheets for Lithium Ion Battery Anodes

*Dongheun Kim<sup>1,‡</sup>, Sun Hae Ra Shin<sup>1,‡</sup>, **Yeonhoo** Kim<sup>1</sup>, Kenneth Crossley<sup>1</sup>, Yerim Kim<sup>1</sup>, Hyungkyu*

*Han<sup>1,#,\*</sup>, and Jinkyong Yoo<sup>1,\*</sup>*

---

Center for Integrated Nanotechnologies, Los Alamos National Laboratory, Los Alamos, NM,  
87545

‡These authors contributed equally to this work

#Present address: Pacific Northwest National Laboratory, Richland, WA99352, USA

### Table of Contents:

1. ZnO nanodisks on ZnO NW trunk
2. ZnO NSs without ZnO NW trunk
3. Voltage profiles for second cycle
4. Voltage profiles of ZnO NWs-NSs at different cycles
5. XRD data of ZnO NWs-NWs and ZnO NWs-NSs

### 1. ZnO nanodisks on ZnO NW trunk

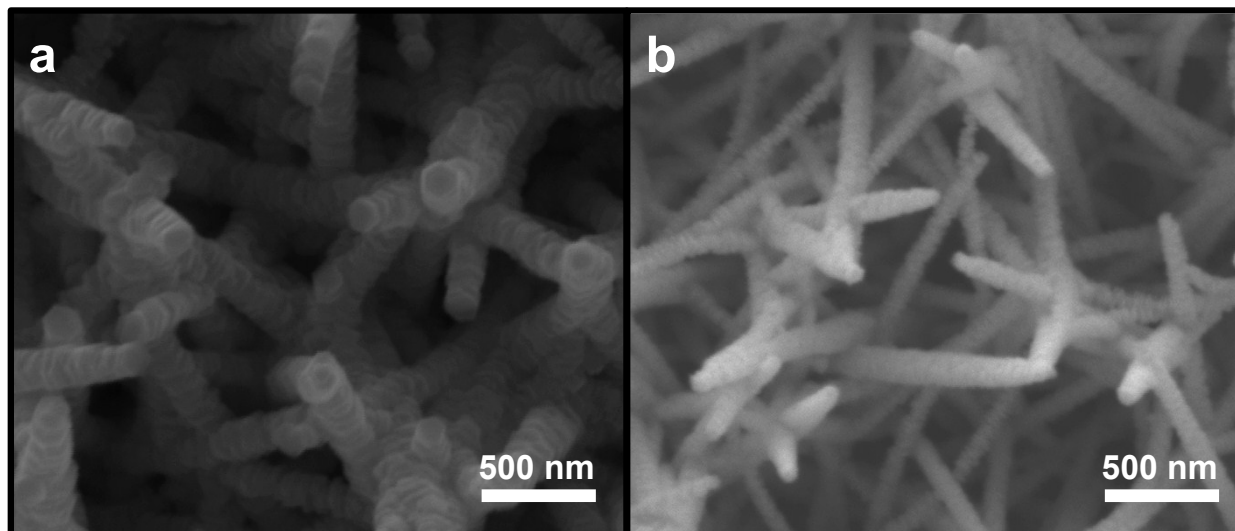

Figure S1. SEM images of ZnO nanodisks on ZnO NW trunk prepared at (a) 0.05 mM and (b) 0.1 mM sodium citrate.

### 2. ZnO NSs without ZnO NW trunk

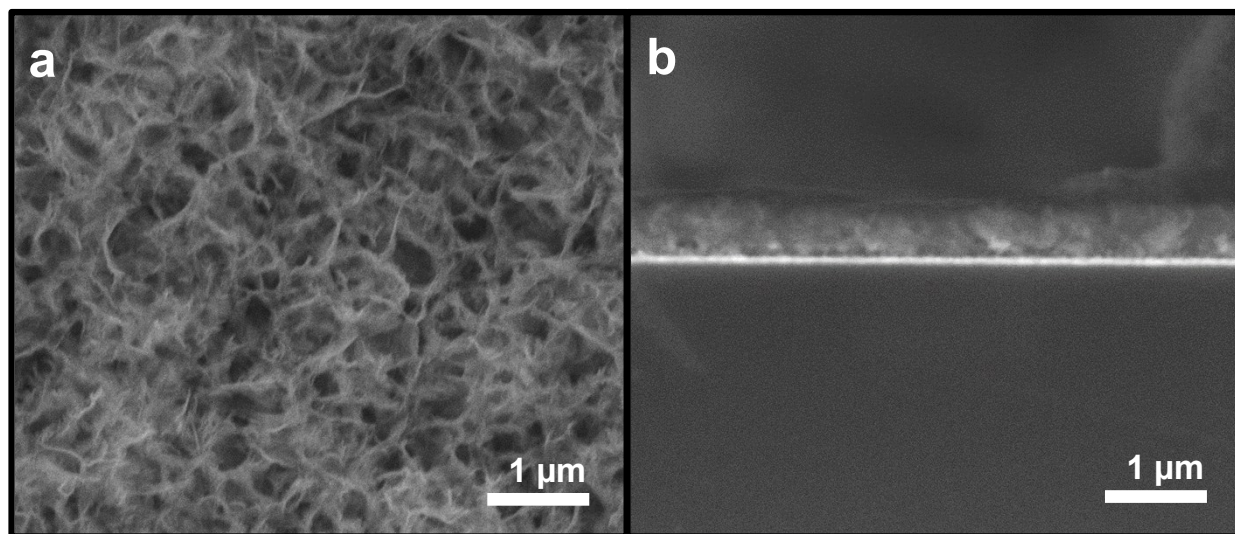

Figure S2. (a) Top and (b) cross-sectional SEM images of ZnO NSs prepared without ZnO NW trunk.

### 3. Voltage profiles for second cycle

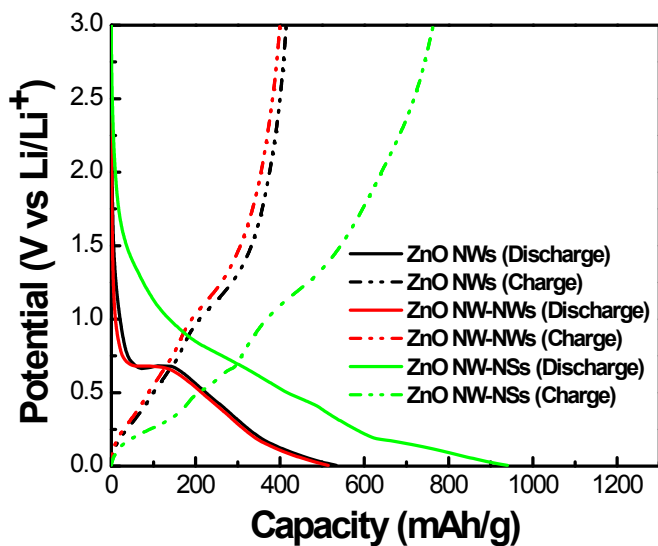

Figure S3. Voltage profiles of ZnO NW (black), ZnO NWs-NWs (red), and ZnO NWs-NSs (green) for the second cycle at a rate of 0.05 C.

### 4. Voltage profiles of ZnO NWs-NSs at different cycles

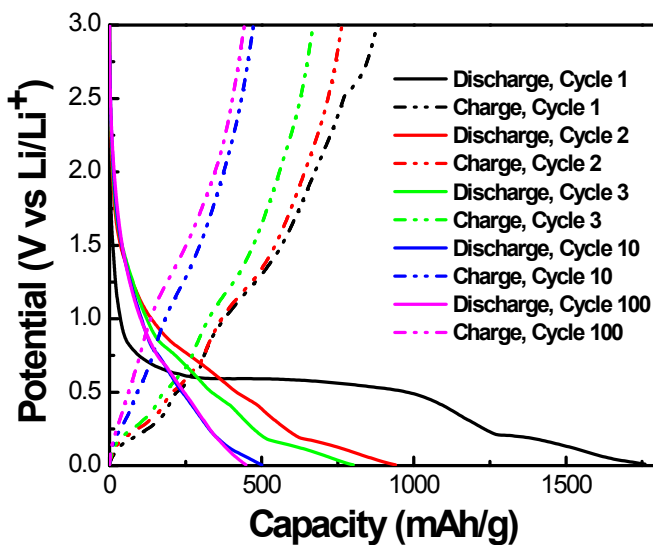

Figure S4. Voltage profiles of ZnO NWs-NSs at different cycles (0.05 C).

## 5. XRD data of ZnO NWs-NWs and ZnO NWs-NSs

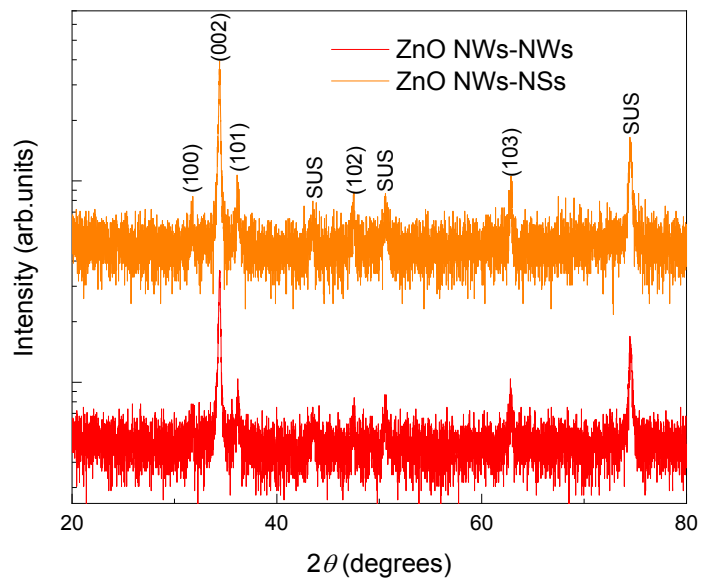

Figure S5. XRD of ZnO NWs-NWs and ZnO NWs-NSs.
